# Supplementary material
Source: Springer Nature journal article supplement (https://www.springermedizin.de/resource/supplementary/12985_2012_1938_MOESM3_ESM.pdf/9610762)

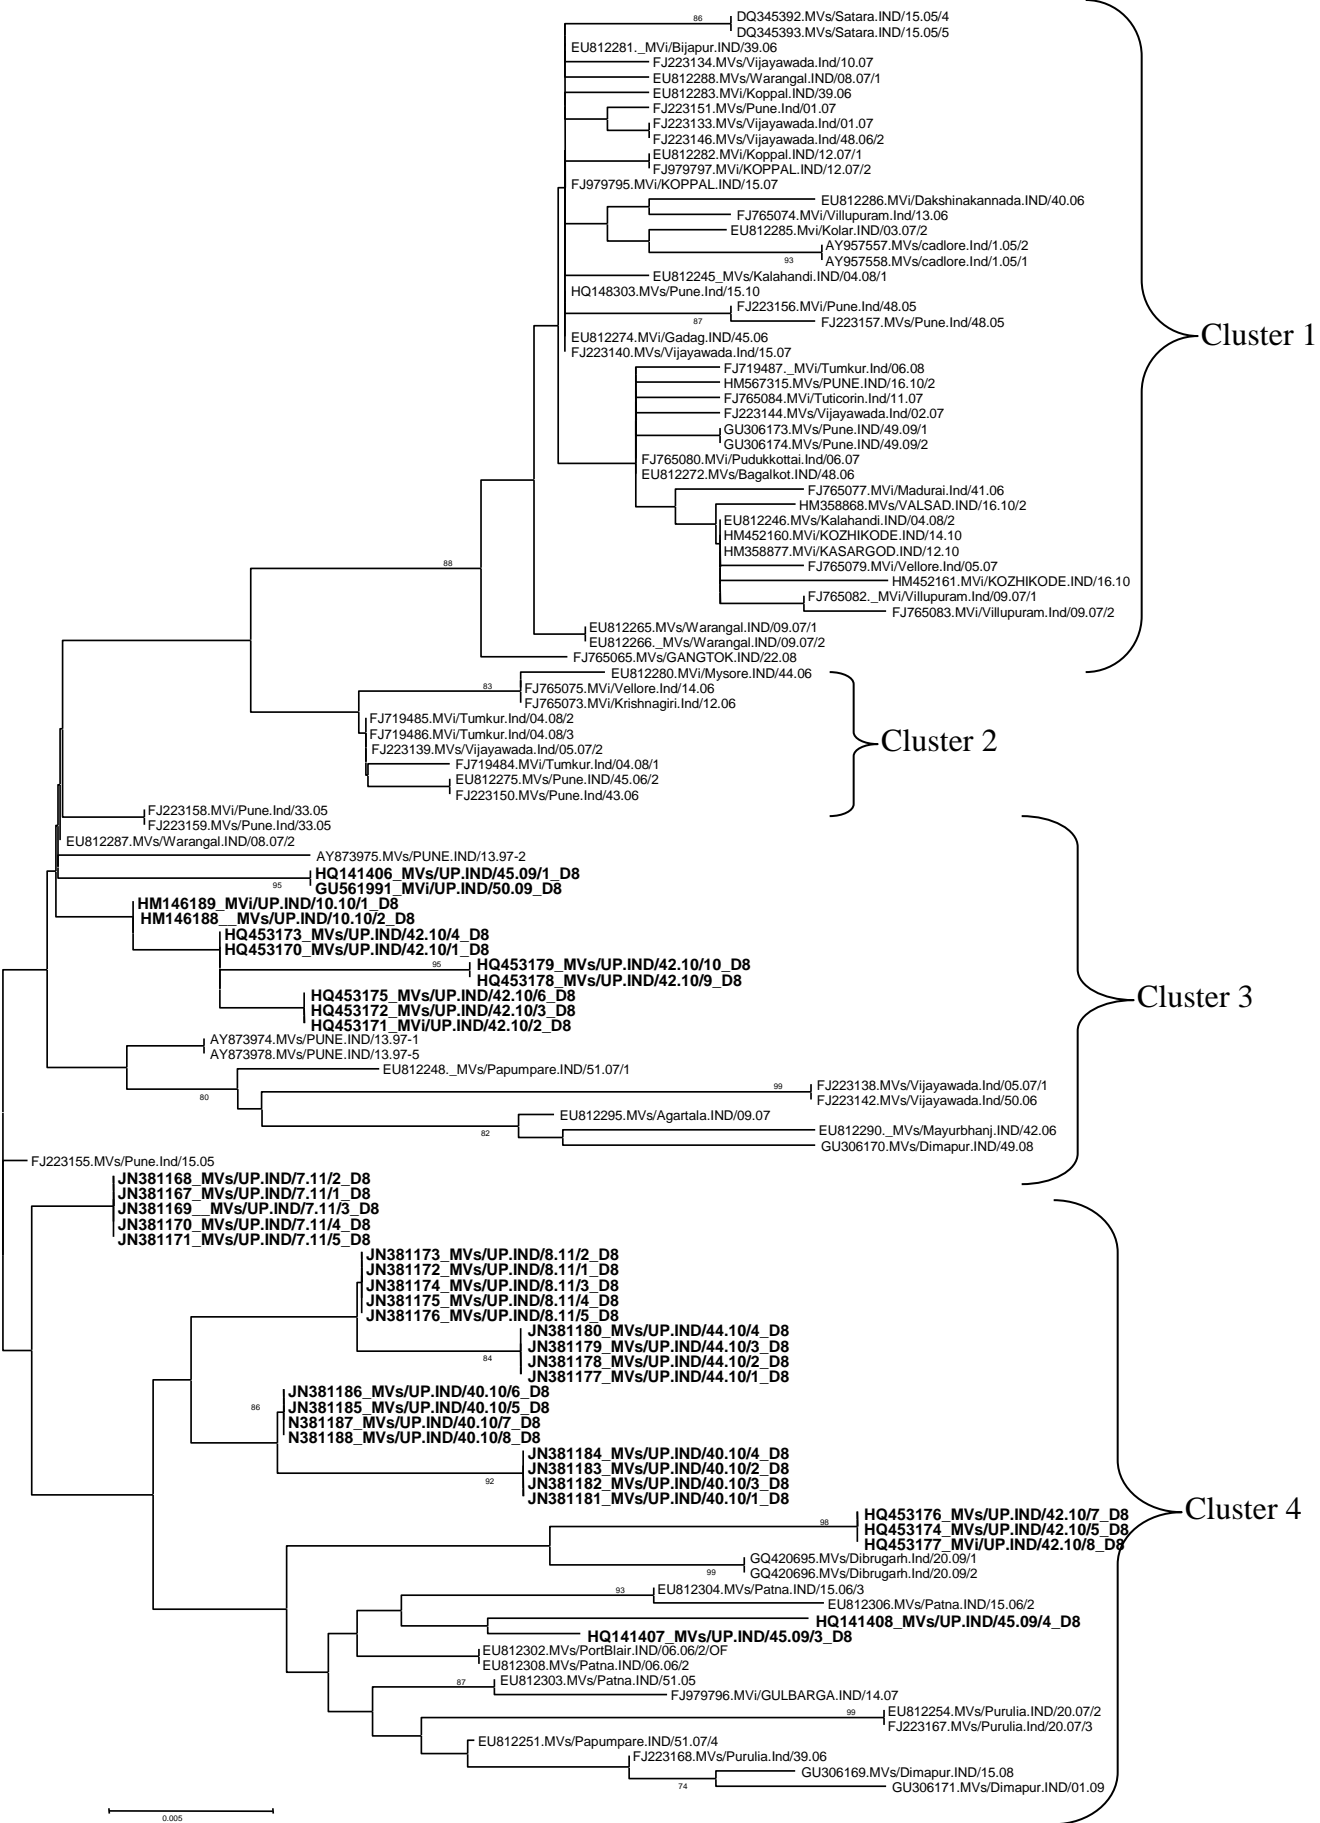

Supplement: MOESM3 [file 9610762]
